# Supplementary material
Source: PubMed Central journal article supplement (PMC5791059)
Supplement: ASN.2017070734SupplementaryData1.pdf [file ASN.2017070734SupplementaryData1.pdf]

## **Supplementary appendix**

### ***Supplementary Note #1: Patients' inclusion and non-inclusion criteria in the GEMRITUX study<sup>11</sup>***

Eligible patients were 18 years of age or older and had a biopsy-proven primary MN (pMN). Patients were enrolled from January 2012 to July 2014 in 31 French centers if they had a urinary protein excretion or a urinary protein/creatinine ratio greater than, or equal to, 3.5 g/day or 3,500 mg/g, respectively, and a serum albumin lower than 30 g/L for at least 6 months despite full dose of Non Immunosuppressive, Antiproteinuric Treatment (NIAT) (angiotensin-converting enzyme inhibitors and/or angiotensin-2 receptor blockers, diuretics and statin). The estimated GFR by MDRD formula had to be above 30 mL/min/1.73m<sup>2</sup>. Exclusion criteria were secondary MN, pregnancy, breast-feeding, immunosuppressive treatment in the three preceding months, and active infectious disease.

### ***Supplementary Note #2: Clinical and immunological remission***

Clinical remission was defined accordingly to 2012 KDIGO (KDIGO clinical practice guideline for glomerulonephritis. *Kidney Int Suppl*.2: 186-197, 2012) as 1) complete in case of urinary protein excretion less than 500 mg per day or 500 mg/g creatinine; 2) partial in case of urinary protein excretion <3.5 g per day or 3,500 mg/g creatinine and ≥500 mg/g creatinine with at least 50% reduction compared to baseline. Antibody depletion was defined as complete disappearance of antibodies in PLA2R1-Ab positive patients.

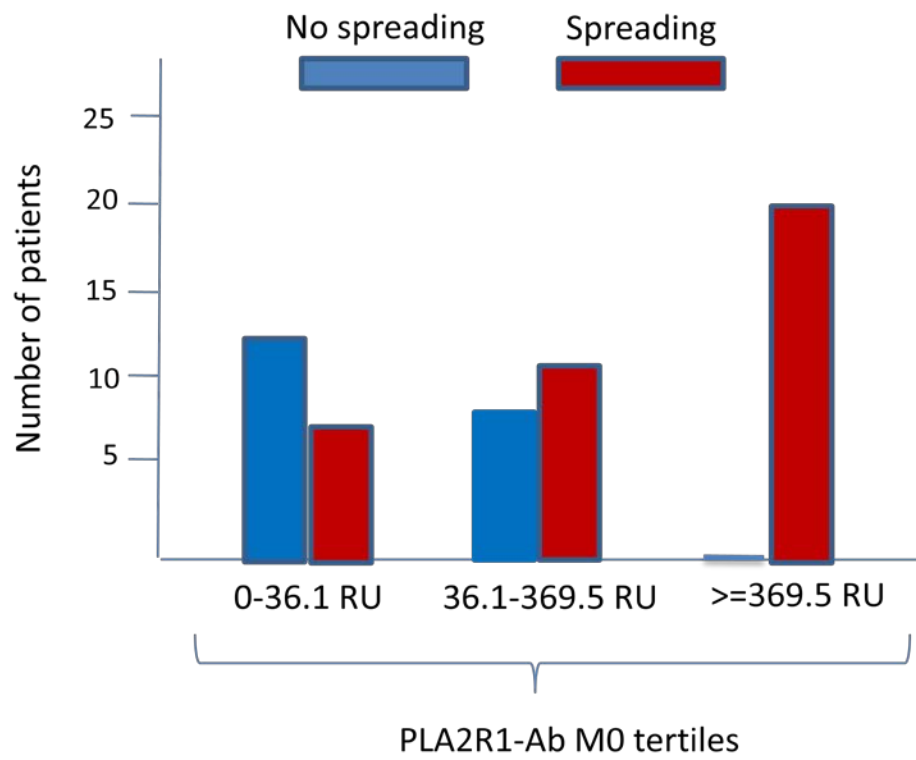

*Supplementary Figure 1: Rate of spreading according to PLA2R1-Ab titer.*

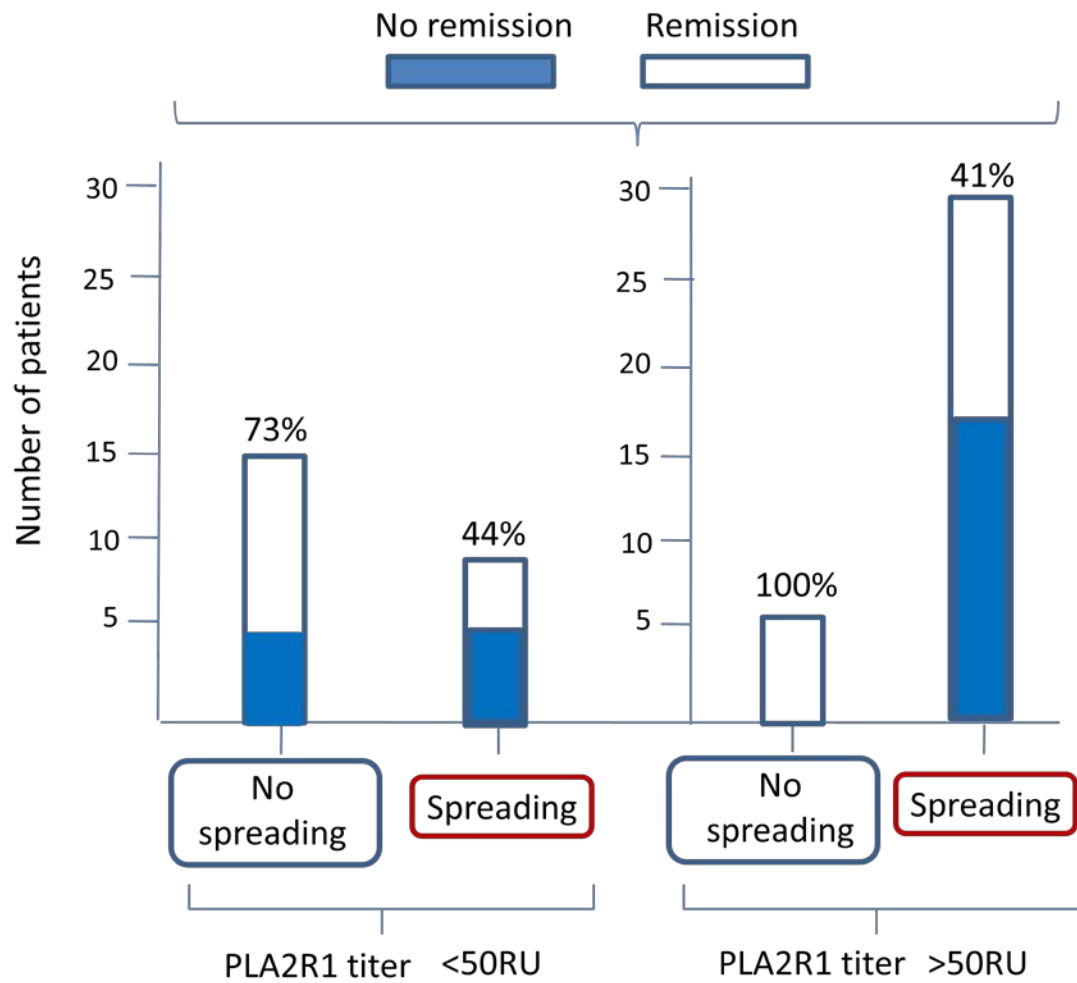

**Supplementary Figure 2: Rate of remission at last follow-up according to antibody titer and epitope spreading.** The numbers above the bars indicate the % remission in the various combinations.

**Supplementary Table 1: Association of epitope group with clinical characteristics of the GEMRITUX cohort (n=58) at baseline.**

| Characteristics at baseline               | Negative<br>n=4    | CysR<br>n=16       | CysRC1<br>n=8          | CysRC7<br>n=10       | CysRC1C7<br>n=20      | P value |
|-------------------------------------------|--------------------|--------------------|------------------------|----------------------|-----------------------|---------|
| Age                                       | 58.5 [43.5 ; 62.0] | 57.5 [43.5 ; 62.0] | 47.5 [38.5 ; 64.0]     | 48.5 [41.0 ; 64.0]   | 59.5 [41.5 ; 63.5]    | 0.9391  |
| Time from diagnosis to inclusion (months) | 8.0 [6.0 ; 17.5]   | 8.0 [6.5 ; 17.5]   | 7.0 [6.0 ; 8.0]        | 8.0 [6.0 ; 11.0]     | 8.5 [6.0 ; 10.0]      | 0.8019  |
| Gender                                    |                    |                    |                        |                      |                       |         |
| Male                                      | 15 (75.0)          | 11 (68.75)         | 6 (75.00)              | 6 (60.00)            | 15 (75.00)            | 0.8118  |
| Female                                    | 5 (25.0)           | 5 (31.25)          | 2 (25.00)              | 4 (40.00)            | 5 (25.00)             |         |
| Anti-PLA2R1 antibody (RU/mL)              | 31.6 [18.0 ; 54.4] | 33.7 [18.0 ; 54.4] | 292.9 [109.6 ; 1085.0] | 469.4 [35.1 ; 710.0] | 359.0 [58.2 ; 1066.5] | 0.0002  |
| Proteinuria (g/g of Creat)                | 7.9 [3.5 ; 8.5]    | 7.3 [3.5 ; 8.4]    | 9.4 [6.4 ; 12.9]       | 9.7 [6.8 ; 11.7]     | 7.0 [5.2 ; 9.6]       | 0.1639  |
| Albuminemia (g/dL)                        | 2.2 [2.0 ; 2.6]    | 2.3 [2.1 ; 2.8]    | 1.9 [1.7 ; 2.3]        | 2.3 [2.1 ; 2.7]      | 2.0 [1.7 ; 2.5]       | 0.2976  |

Creat, serum creatinine

Data are shown as n (%) or median [IQR].

Patients were divided into 4 epitope groups

**SupplementaryTable 2: Association of epitope spreading with clinical characteristics of the GEMRITUX cohort (n=58) at baseline.**

| Characteristics at baseline               | No spreading<br>n=20 | Spreading<br>N=38    | P value |
|-------------------------------------------|----------------------|----------------------|---------|
| Age                                       | 58.5 [43.5 ; 62.0]   | 52.0 [41.0 ; 64.0]   | 0.8386  |
| Time from diagnosis to inclusion (months) | 8.0 [6.0 ; 17.5]     | 8.0 [6.0 ; 9.0]      | 0.4987  |
| Gender                                    |                      |                      |         |
| Male                                      | 15 (75.0)            | 27 (71.05)           | 1       |
| Female                                    | 5 (25.0)             | 11 (28.95)           |         |
| Anti-PLA2R1 antibody (RU/mL)              | 31.6 [18.0 ; 54.4]   | 376.9 [75.8 ; 746.5] | <.0001  |
| Proteinuria (g/g of Creat)                | 7.9 [3.5 ; 8.5]      | 8.3 [6.2 ; 10.4]     | 0.1649  |
| Albuminemia (g/dL)                        | 2.2 [2.0 ; 2.6]      | 2.1 [1.8 ; 2.5]      | 0.5252  |

Creat, serum creatinine

Data are shown as n (%) or median [IQR].

Patients were divided into “no spreading” (CysR only patients) and “spreading” (at least one additional epitope to CysR) groups.

**Supplementary Table 3: Comparison of epitope reactivity subtypes at various timepoints between the NIAT only group and the NIAT-Rituximab group**

|          | NIAT |    |    | NIAT+RITUX |    |    |
|----------|------|----|----|------------|----|----|
|          | M0   | M3 | M6 | M0         | M3 | M6 |
| Negative | 0    | 0  | 0  | 0          | 12 | 17 |
| CysR     | 11   | 7  | 12 | 9          | 3  | 2  |
| CysRC1   | 4    | 6  | 4  | 4          | 3  | 1  |
| CysRC7   | 6    | 3  | 2  | 4          | 3  | 0  |
| CysRC1C7 | 8    | 7  | 6  | 12         | 5  | 6  |
| Total    | 29   | 23 | 24 | 29         | 26 | 26 |

**SupplementaryTable 4: Clinical and immunological characteristics of patients according to outcome at M6**

| Characteristics                  | Remission<br>n=15      | No remission<br>n=43    | P value |
|----------------------------------|------------------------|-------------------------|---------|
| Age                              | 58.0 [43.0 ; 63.0]     | 51.0 [41.0 ; 63.0]      | 0.4966  |
| Gender                           |                        |                         |         |
| Male                             | 11 (73.33)             | 31 (72.09)              | 1       |
| Female                           | 4 (26.67)              | 12 (27.91)              |         |
| Proteinuria (g/g of Creat) M0    | 7.4 [3.6 ; 12.8]       | 8.2 [5.6 ; 9.8]         | 0.9859  |
| Albuminemia (g/dL) M0            | 2.1 [1.7 ; 2.4]        | 2.2 [1.9 ; 2.6]         | 0.6645  |
| Anti-PLA2R1 antibody (RU/mL)M0   | 35.4 [24.2 ; 216.3]    | 199.5 [35.1 ; 538.5]    | 0.1435  |
| Anti-CysR(RU/mL)                 | 369.0 [258.0 ; 2710.0] | 1575.0 [528.0 ; 3356.0] | 0.0796  |
| Anti-CTLD1(RU/mL)                | 16.0 [0.0 ; 257.0]     | 424.0 [0.0 ; 3477.0]    | 0.1748  |
| Anti-CTLD7(RU/mL)                | 30.0 [0.0 ; 223.0]     | 272.0 [48.0 ; 706.0]    | 0.0098  |
| Epitope group M0                 |                        |                         | 0.0809  |
| CysR                             | 9 (60.00)              | 11 (25.58)              |         |
| CysRC1                           | 2 (13.33)              | 6 (13.95)               |         |
| CysRC7                           | 2 (13.33)              | 8 (18.60)               |         |
| CysRC1C7                         | 2 (13.33)              | 18 (41.86)              |         |
| Spreading M0                     | 6 (40)                 | 32 (74.42)              | 0.0262  |
| Anti-PLA2R1 antibody (RU/mL) M3* | 0.0 [0.0 ; 30.5]       | 55.9 [16.2 ; 137.8]     | 0.0093  |
| Epitope group M3**               |                        |                         |         |
| Negative                         | 6 (46.15)              | 6 (16.67)               |         |
| CysR                             | 5 (38.46)              | 5 (13.89)               |         |
| CysRC1                           | 0 (0.00)               | 9 (25.00)               | 0.0130  |
| CysRC7                           | 0 (0.00)               | 6 (16.67)               |         |
| CysRC1C7                         | 2 (15.38)              | 10 (27.78)              |         |
| Spreading M3 **                  | 2/13(13.33)            | 25/36(58.14)            | 0.0011  |
| Treatment                        |                        |                         |         |
| NIAT                             | 6 (40.0)               | 23(53.5)                | 0.55    |
| RITUX                            | 9 (60.0)               | 20(46.5)                |         |

\*: 8 missing values, \*\*: 9 missing values.Creat, serum creatinine

Data are shown as n (%) or median [IQR].

Note that lack of remission was associated with higher level of anti-CTLD7 antibody and higher rate of spreading at baseline whereas PLA2R1-Ab titer did not reach statistical significance.

**Supplementary Table 5: Clinical and immunological characteristics of patients according to outcome at last follow-up**

| Characteristics                  | Remission<br>n=32      | No remission<br>n=26    | P value  |
|----------------------------------|------------------------|-------------------------|----------|
| Age                              | 56.5 [43.5 ; 63.0]     | 53.5 [39.0 ; 64.0]      | 0.6857   |
| Gender                           |                        |                         |          |
| Male                             | 19 (73.08)             | 23 (71.88)              | 1        |
| Female                           | 7 (26.92)              | 9 (28.13)               |          |
| Proteinuria (g/g of Creat) M0    | 7.9 [4.3 ; 10.1]       | 8.3 [6.3 ; 9.7]         | 0.6353   |
| Albuminemia (g/dL) M0            | 2.1 [1.9 ; 2.6]        | 2.2 [1.9 ; 2.5]         | 0.6402   |
| Anti-PLA2R1 antibody (RU/mL) M0  | 63.1 [26.9 ; 304.6]    | 363.7 [37.9 ; 710.0]    | 0.0967   |
| Anti-CysR (RU/mL)                | 963.5 [276.0 ; 2141.0] | 2139.5 [959.0 ; 3356.0] | 0.0358   |
| Anti-CTLD1 (RU/mL)               | 12.5 [0.0 ; 847.0]     | 1730.5 [12.0 ; 5803.0]  | 0.0065   |
| Anti-CTLD7 (RU/mL)               | 81.5 [14.5 ; 259.5]    | 473.0 [36.0 ; 1115.0]   | 0.0143   |
| Epitope group M0                 |                        |                         | 0.0196   |
| CysR                             | 16 (50.00)             | 4 (15.38)               |          |
| CysRC1                           | 3 (9.38)               | 5 (19.23)               |          |
| CysRC7                           | 6 (18.75)              | 4 (15.38)               |          |
| CysRC1C7                         | 7 (21.88)              | 13 (50.00)              |          |
| Spreading M0                     | 16 (50)                | 22 (84.62)              | 0.0114   |
| Anti-PLA2R1 antibody (RU/mL) M3* | 0.0 [0.0 ; 49.1]       | 102.5 [41.1 ; 325.9]    | 0.0006   |
| Epitope group M3**               |                        |                         | 0.0007   |
| Negative                         | 11 (37.93)             | 1 (5.00)                |          |
| CysR                             | 9 (31.03)              | 1 (5.00)                |          |
| CysRC1                           | 3 (10.34)              | 6 (30.00)               |          |
| CysRC7                           | 3 (10.34)              | 3 (15.00)               |          |
| CysRC1C7                         | 3 (10.34)              | 9 (45.00)               |          |
| Spreading M3**                   | 9/29 (31.03)           | 18/20 (90.0)            | < 0.0001 |
| Treatment                        |                        |                         | 0.1964   |
| NIAT                             | 13 (40.6)              | 16 (61.5)               |          |
| RITUX                            | 19 (59.4)              | 10 (38.5)               |          |

\*8 missing values; \*\* 9 missing. Creat, serum creatinine

Data are shown as n (%) or median [IQR].

Note that lack of remission was associated with spreading at baseline and M3, and PLA2R-Ab titer at M3.
